# Supplementary figures and images for: LRH1-driven transcription factor circuitry for hepatocyte identity: Super-enhancer cistromic analysis
Source: PubMed Central journal article supplement — eBioMedicine. 2019 Jan 9;40:488–503. doi: 10.1016/j.ebiom.2018.12.056 (PMC6413675; doi:10.1016/j.ebiom.2018.12.056), 2019-01-09

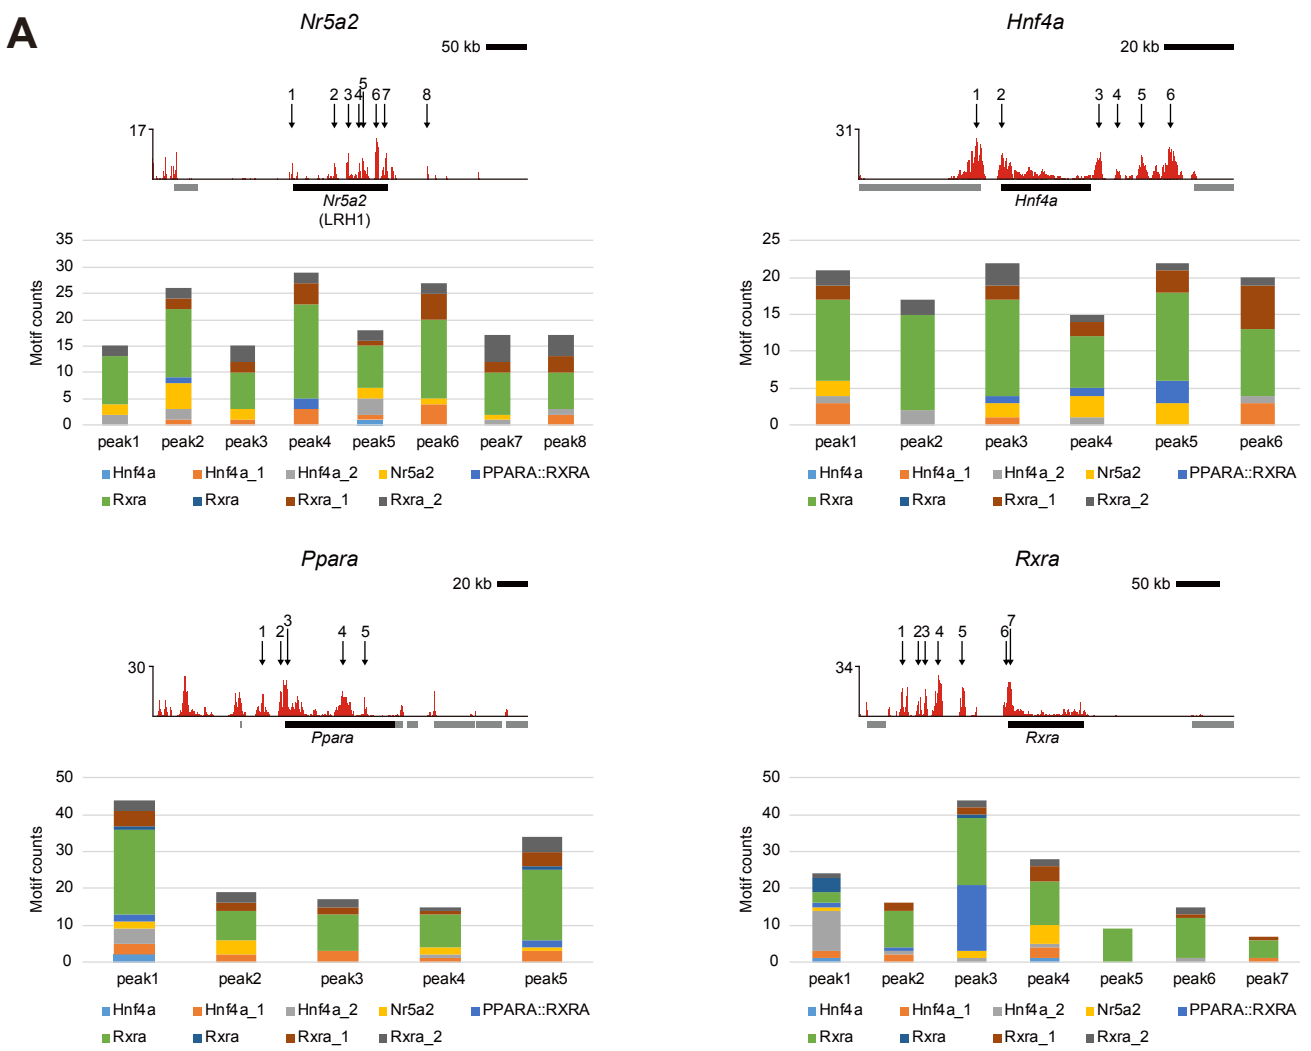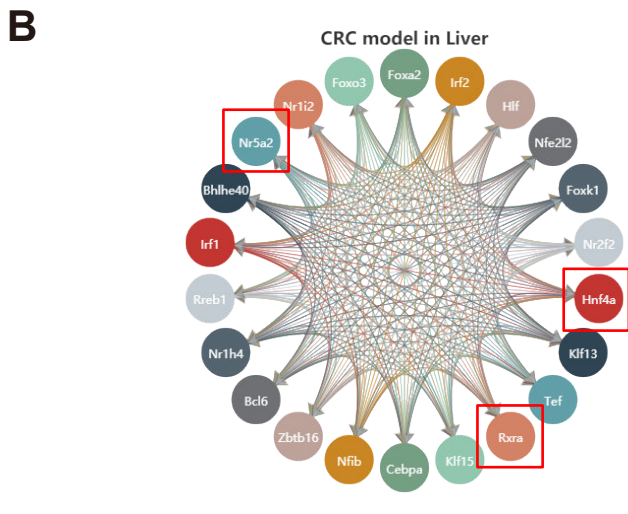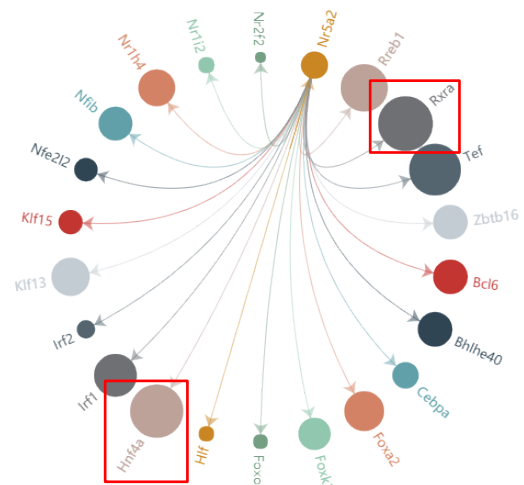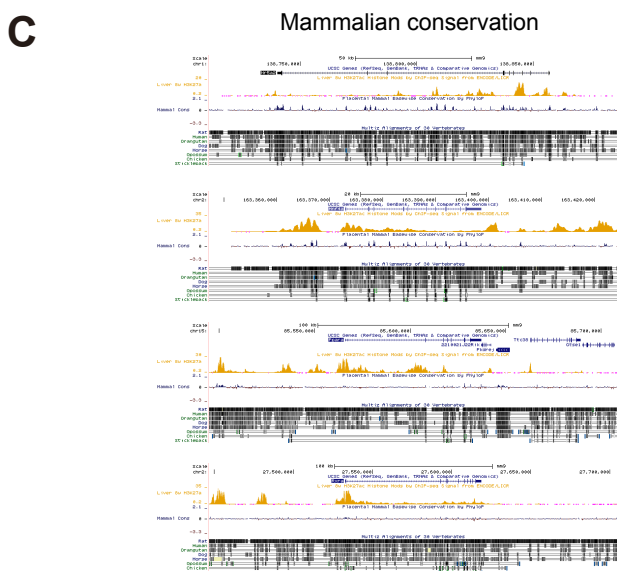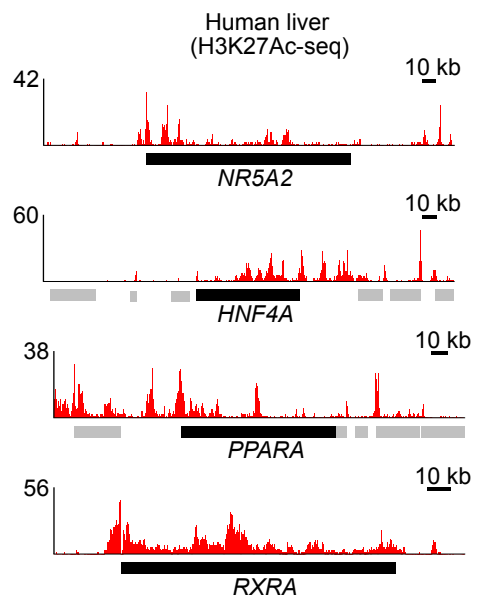

Figure S1

Supplement: mmc1.pdf [file mmc1.pdf]

**A**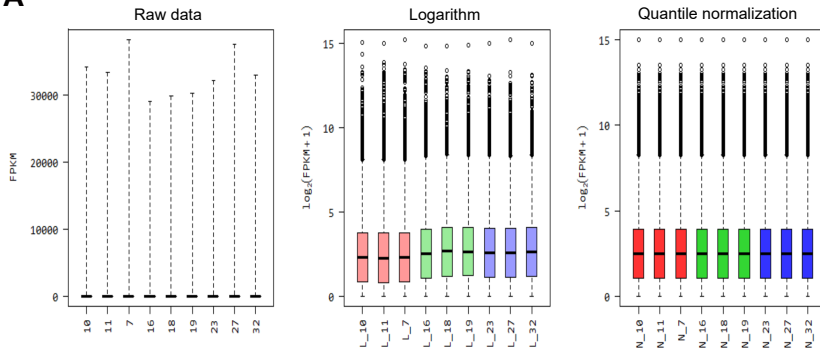**B**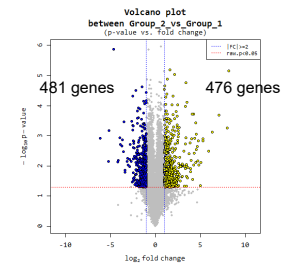

Figure S2

Supplement: mmc2.pdf [file mmc2.pdf]

**A**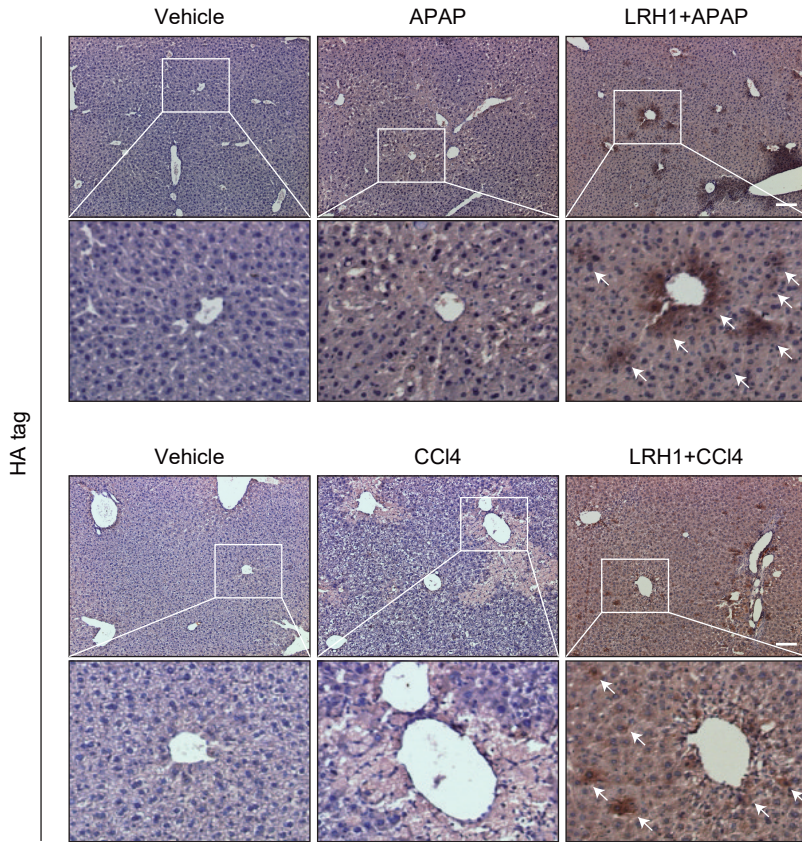**B**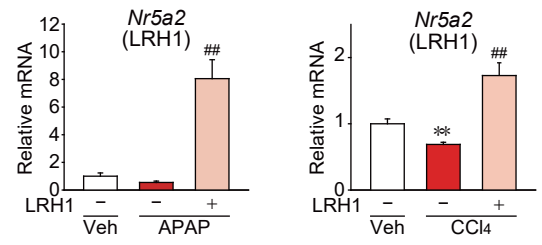**D**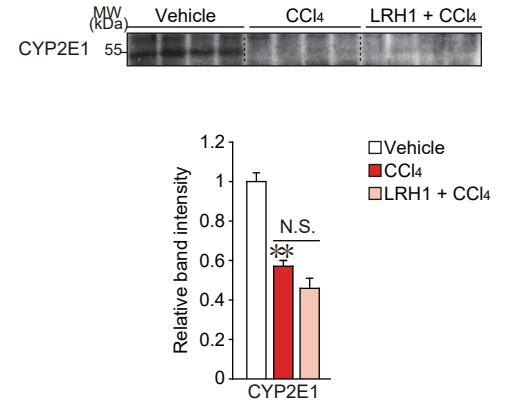**C**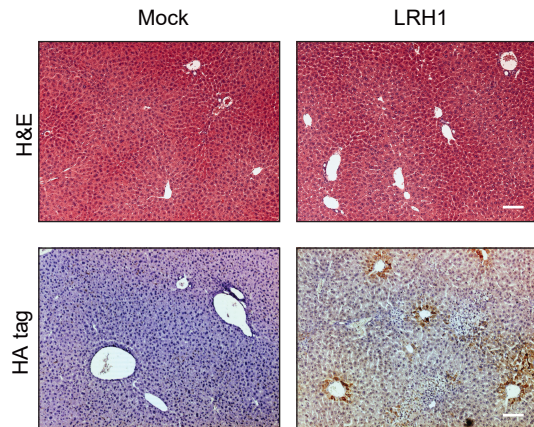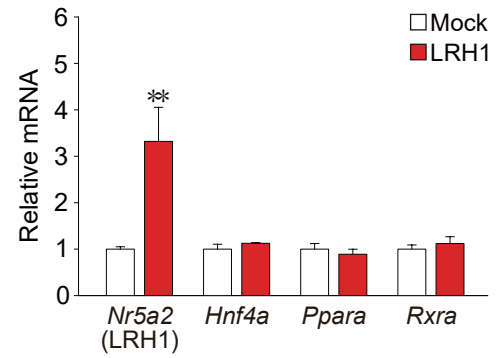

Figure S3

Supplement: mmc3.pdf [file mmc3.pdf]

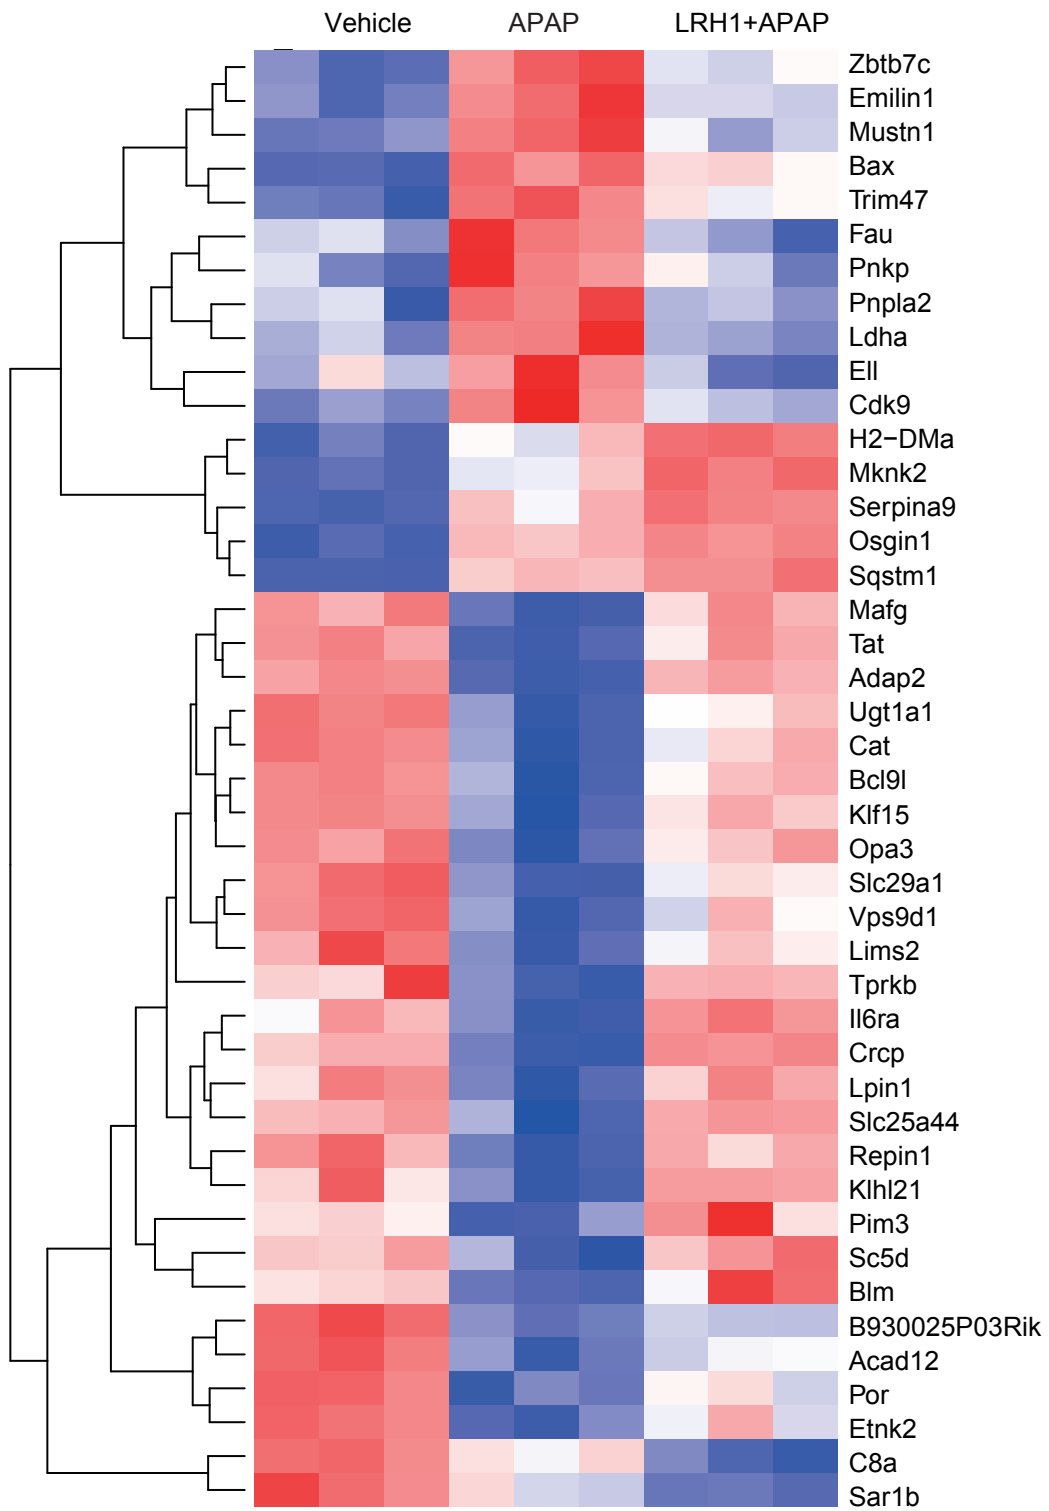

Figure S4

Supplement: mmc4.pdf [file mmc4.pdf]

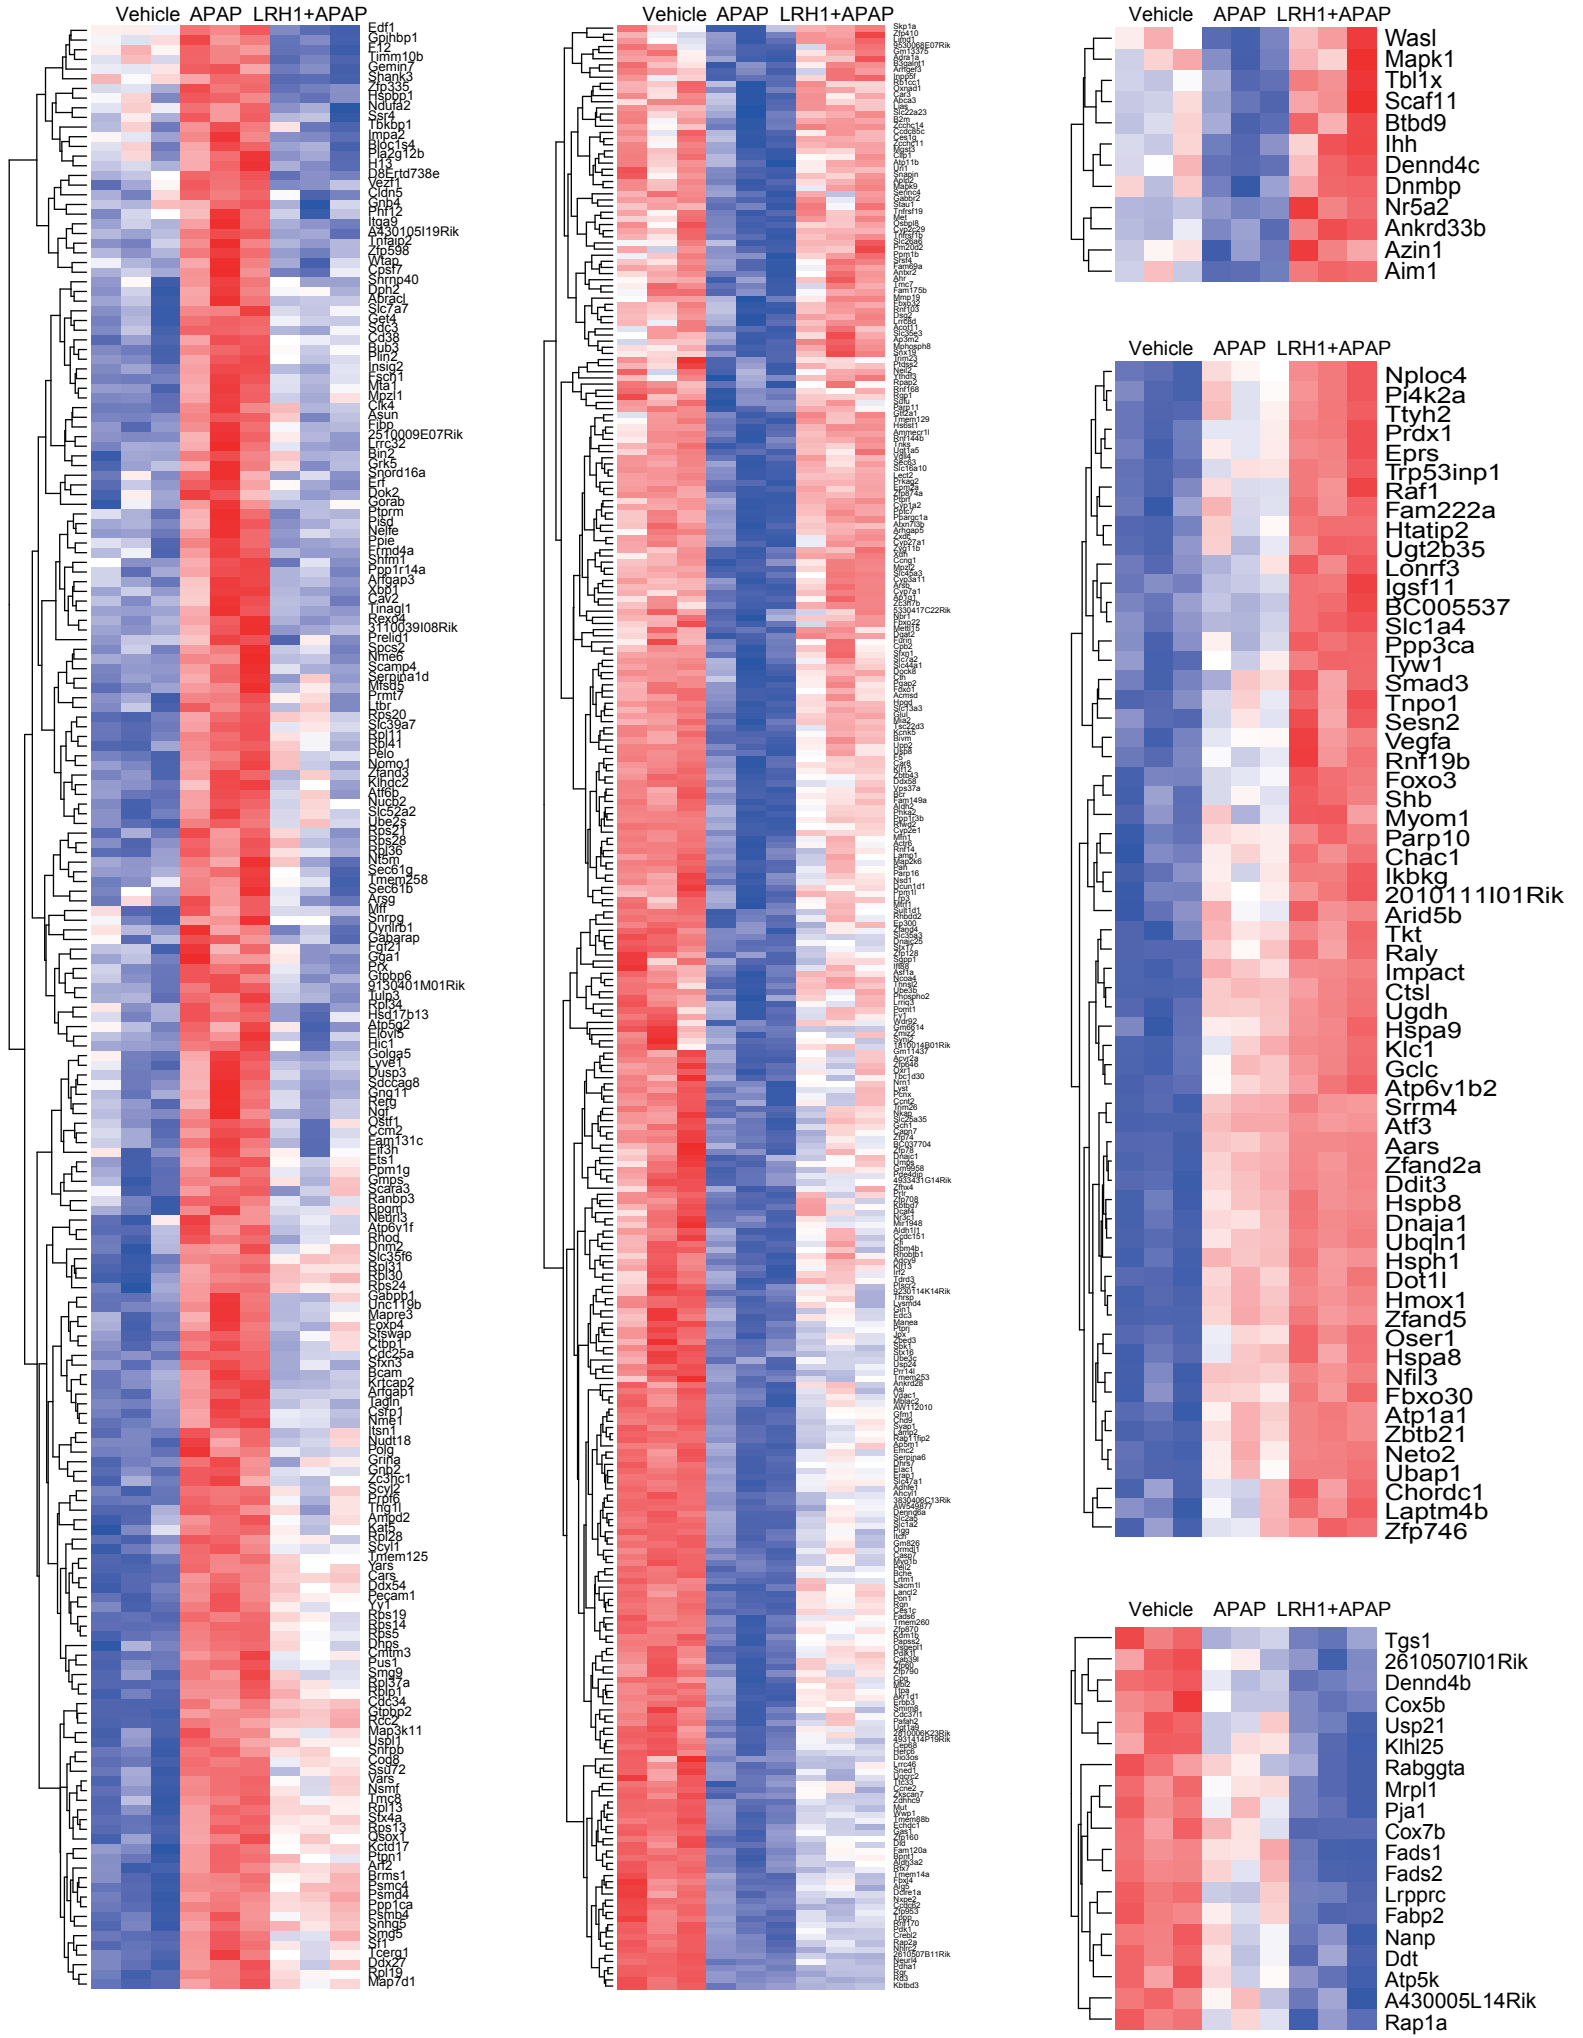

Figure S5

Supplement: mmc5.pdf [file mmc5.pdf]
